# ERRATUM

The article by Musch *et al.* entitled "Mechanism by Which a Sustained Inflation Can Worsen Oxygenation in Acute Lung Injury" was published in the February issue of the Journal (ANESTHESIOLOGY 2004; 100:323-30) with figures 3 and 4 presented in poor quality. These figures are reprinted here in corrected form. The publisher regrets the error.

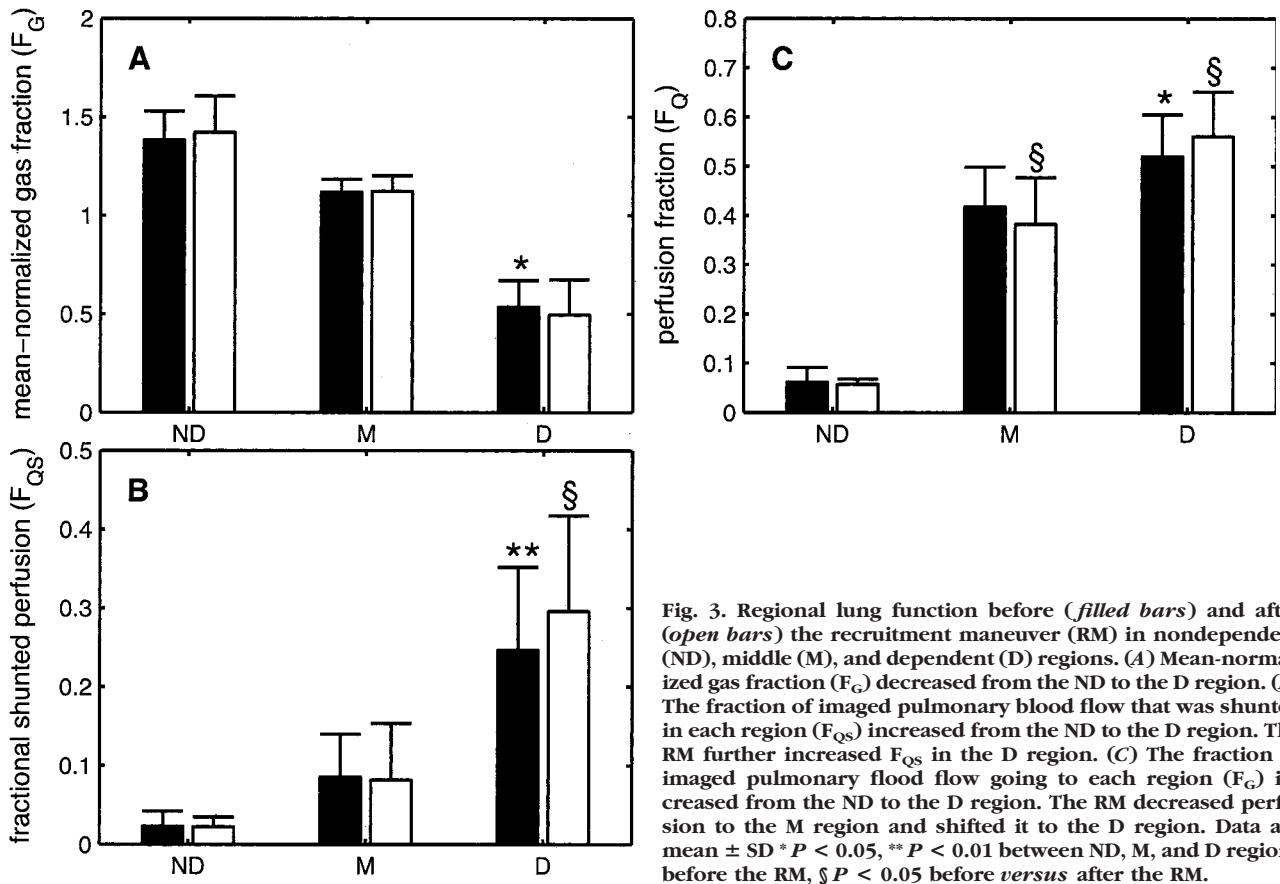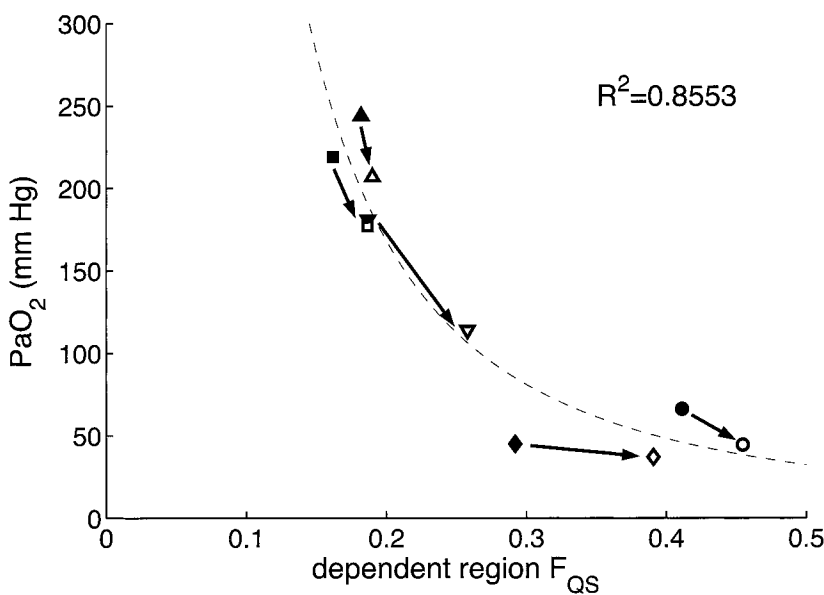

Fig. 4. Correlation between  $PaO_2$  and fractional shunted blood flow ( $F_{QS}$ ) in the dependent region. The dashed curve represents the regression relation for all 10 data points ( $PaO_2 = 9.3 \times [F_{QS}]^{-1.8}$ ). Symbols for each animal are as in figure 2. As shown by the arrows, in each animal,  $PaO_2$  decreased and  $F_{QS}$  in the dependent region increased from before (filled symbols) to after (open symbols) the recruitment maneuver. The lines connecting the individual data points corresponding to each animal have approximately the same slope as the dashed curve. This suggests that the effect of the recruitment maneuver  $PaO_2$  could be largely explained by its effect on  $F_{QS}$  in the dependent region.
